# Supplementary material for: Enhancing oil production and harvest by combining the marine alga Nannochloropsis oceanica and the oleaginous fungus Mortierella elongata
Source: PubMed Central journal article supplement (PMC6013958; doi:10.1186/s13068-018-1172-2), 2018-06-22
Supplement: 13068_2018_1172_MOESM1_ESM.pdf [file 13068_2018_1172_MOESM1_ESM.pdf]

**Table S1.** Lipid and fatty acid contents of *Mortierella* fungi incubated in different media in shaker flasks (mg g<sup>-1</sup> total dry weight).

| Strains                                | Total lipid  | TAG          | ARA        | EPA         | PUFAs      |
|----------------------------------------|--------------|--------------|------------|-------------|------------|
| <i>M. elongata</i> AG77, PDB, pH5.3    | 128.2 ± 11.9 | 15.3 ± 1.0   | 27.9 ± 1.3 | 6.14 ± 0.8  | 78.9 ± 1.3 |
| <i>M. elongata</i> AG77, PDB, pH7.6    | 170.2 ± 17.6 | 31.8 ± 2.0   | 25.2 ± 3.1 | 1.7 ± 1.1   | 48.9 ± 2.9 |
| <i>M. elongata</i> AG77, f/2+1% sugar  | 233.2 ± 21.8 | 106.1 ± 12.3 | 15.5 ± 0.2 | 3.0 ± 0.1   | 41.5 ± 1.1 |
| <i>M. elongata</i> AG77, f/2           | 238.8 ± 14.5 | 94.6 ± 4.5   | 42.4 ± 2.3 | 4.3 ± 0.5   | 89.1 ± 4.8 |
| <i>M. gamsii</i> GBAus22, PDB, pH5.3   | 101.2 ± 13.6 | 5.3 ± 1.4    | 33.8 ± 2.4 | 2.09 ± 0.08 | 69.9 ± 0.9 |
| <i>M. gamsii</i> GBAus22, PDB, pH7.6   | 108.9 ± 12.5 | 11.7 ± 1.4   | 31.7 ± 1.4 | 2.9 ± 0.2   | 58.3 ± 1.8 |
| <i>M. gamsii</i> GBAus22, f/2+1% sugar | 139.4 ± 12.5 | 34.7 ± 4.4   | 16.4 ± 1.6 | 2.1 ± 0.2   | 39.0 ± 3.1 |
| <i>M. gamsii</i> GBAus 22, f/2         | 178.0 ± 23.9 | 54.9 ± 3.9   | 29.3 ± 2.1 | 1.7 ± 0.5   | 66.1 ± 2.2 |

TAG, triacylglycerol; ARA, arachidonic acid (20:4); EPA, eicosapentaenoic acid (20:5); PUFAs, polyunsaturated fatty acids; f/2+1% sugar, f/2 medium supplemented with 1% glucose, pH7.6. Results are the average of five biological replicates with error bars indicating standard deviations.
