# Supplementary material for: Enhancing oil production and harvest by combining the marine alga Nannochloropsis oceanica and the oleaginous fungus Mortierella elongata
Source: PubMed Central journal article supplement (PMC6013958; doi:10.1186/s13068-018-1172-2), 2018-06-22
Supplement: 13068_2018_1172_MOESM2_ESM.pdf [file 13068_2018_1172_MOESM2_ESM.pdf]

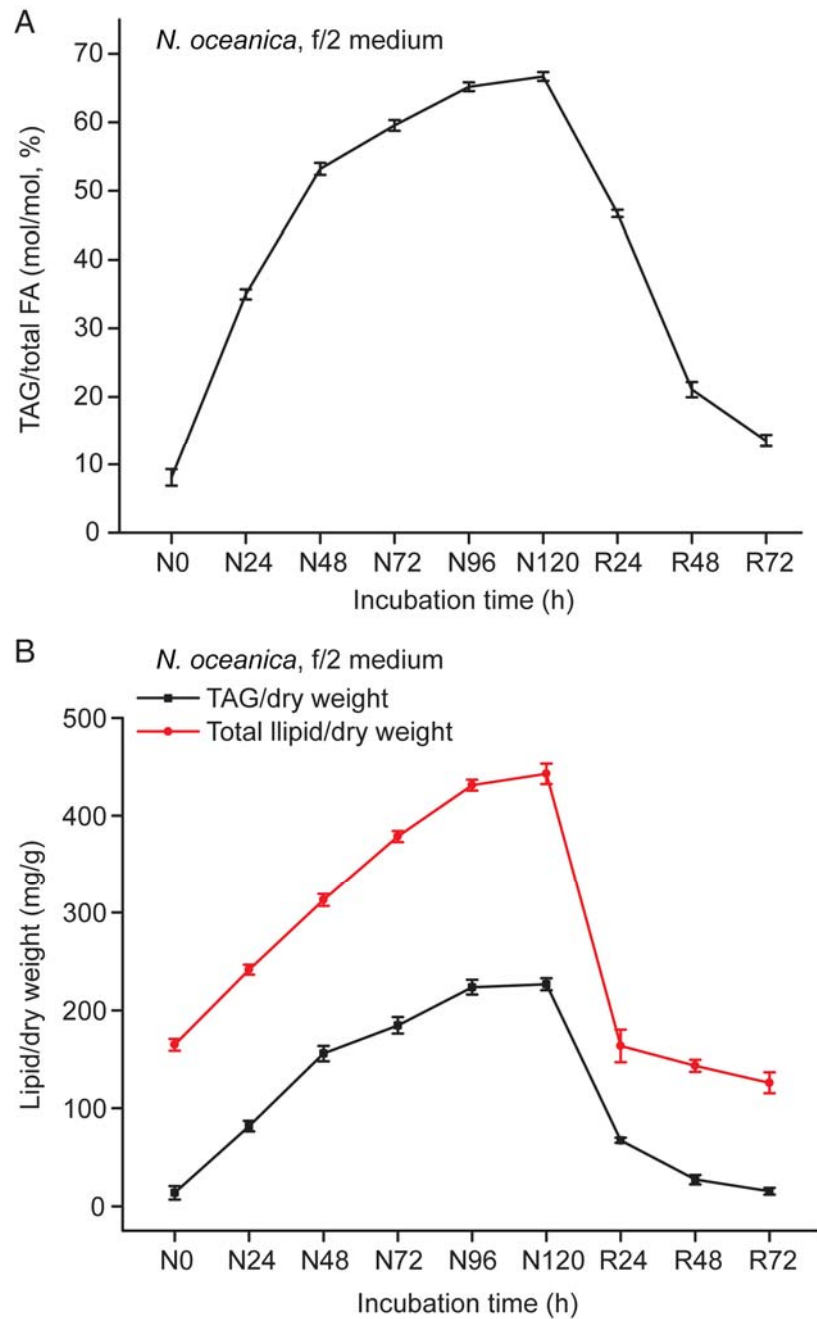

**Figure S1.** Triacylglycerol content in *N. oceanica* cells. A, Mole ratio of triacylglycerol (TAG) compared to total lipid. Cells were grown in shaker flasks. N0-120, N deprivation(f/2 medium lacking N 0-120 h; R24-72, N resupply (f/2) medium for 24-72 h. The average of three biological replicates and standard deviation are shown (n = 3). B, TAG and total lipid content per gram of whole cell dry weight. n = 3.
