# Supplementary material for: Enhancing oil production and harvest by combining the marine alga Nannochloropsis oceanica and the oleaginous fungus Mortierella elongata
Source: PubMed Central journal article supplement (PMC6013958; doi:10.1186/s13068-018-1172-2), 2018-06-22
Supplement: 13068_2018_1172_MOESM3_ESM.pdf [file 13068_2018_1172_MOESM3_ESM.pdf]

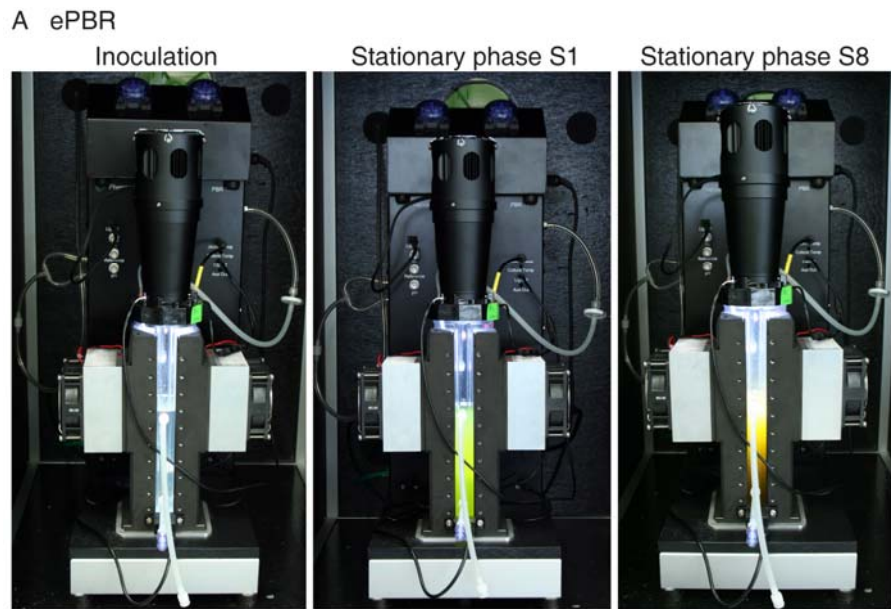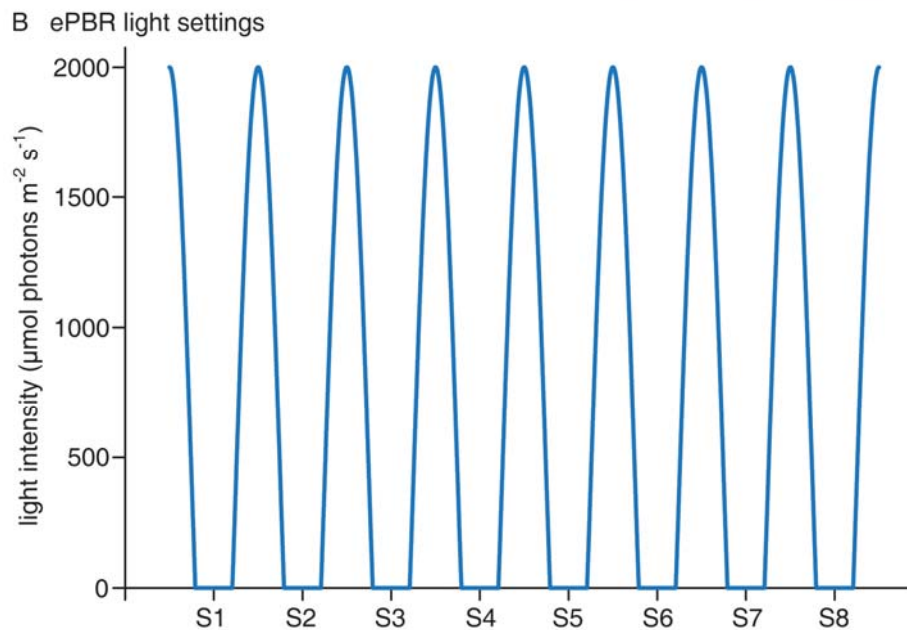

**Figure S2.** Incubation of *N. oceanica* cells in the environmental photobioreactor (ePBR). A, *N. oceanica* cells were inoculated in the f/2 medium containing  $\text{NH}_4\text{Cl}$  (left image) and were incubated in the ePBR to stationary phase (day 1, S1; middle image) and further grown for 8 days (S8; right image). Cultures were incubated under fluctuating light at  $23^\circ\text{C}$  and were sparged with air enriched to 5%  $\text{CO}_2$  at  $0.37 \text{ L min}^{-1}$  for 2 min per h. B, Light conditions for the cultures in the ePBR: fluctuating lights ( $0$  to  $2,000 \mu\text{mol photons m}^{-2} \text{s}^{-1}$ ) under diurnal 14/10 h light/dark cycle.
