# Supplementary material for: Enhancing oil production and harvest by combining the marine alga Nannochloropsis oceanica and the oleaginous fungus Mortierella elongata
Source: PubMed Central journal article supplement (PMC6013958; doi:10.1186/s13068-018-1172-2), 2018-06-22
Supplement: 13068_2018_1172_MOESM4_ESM.pdf [file 13068_2018_1172_MOESM4_ESM.pdf]

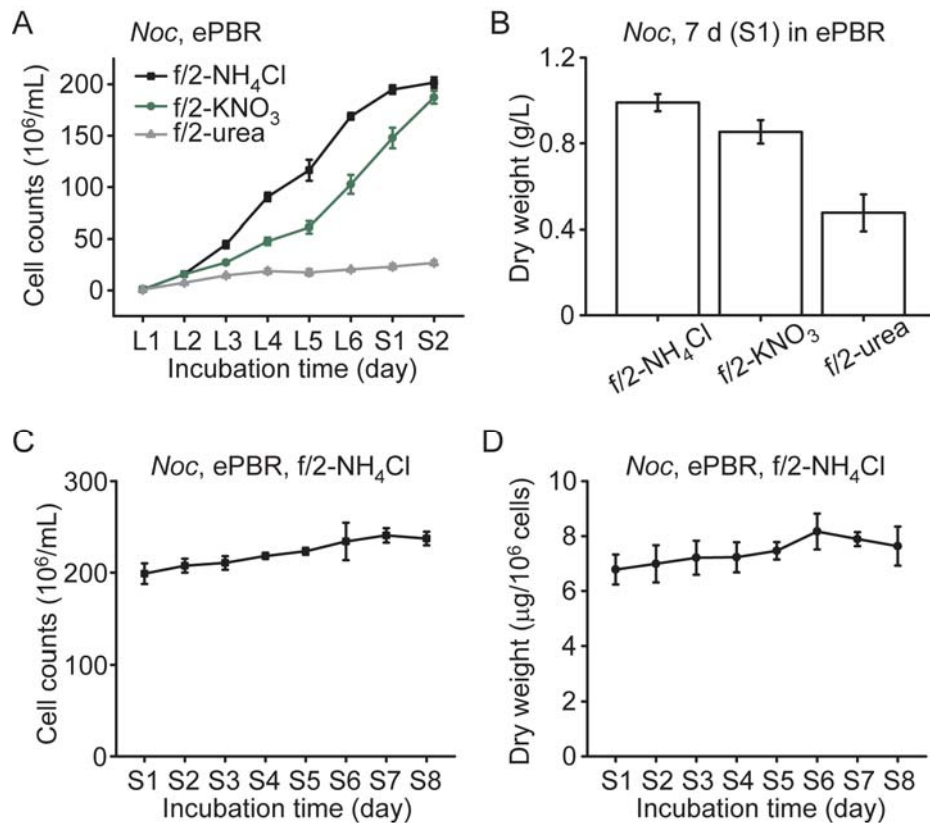

**Figure S3.** Cell growth and biomass in the environmental photobioreactor (ePBR). A, *N. oceanica* (*Noc*) cells were inoculated to  $\sim 1 \times 10^6 \text{ mL}^{-1}$  and incubated in the environmental photobioreactor containing modified f/2 media with NH<sub>4</sub>Cl, KNO<sub>3</sub>, or urea as N source. L1-6, day 1-6 of log phase; S1 and 2, day 1 and 2 of stationary phase. The average of three biological replicates and standard deviation are shown ( $n = 3$ ). B, Dry weight per L of cells grown in different f/2 media.  $n = 3$ . C, Cell growth during S1-8 in f/2-NH<sub>4</sub>Cl.  $n = 3$ . D, Cell dry weight during S1-8 in f/2-NH<sub>4</sub>Cl.  $n = 3$ .
