# Supplementary material for: Enhancing oil production and harvest by combining the marine alga Nannochloropsis oceanica and the oleaginous fungus Mortierella elongata
Source: PubMed Central journal article supplement (PMC6013958; doi:10.1186/s13068-018-1172-2), 2018-06-22
Supplement: 13068_2018_1172_MOESM6_ESM.pdf [file 13068_2018_1172_MOESM6_ESM.pdf]

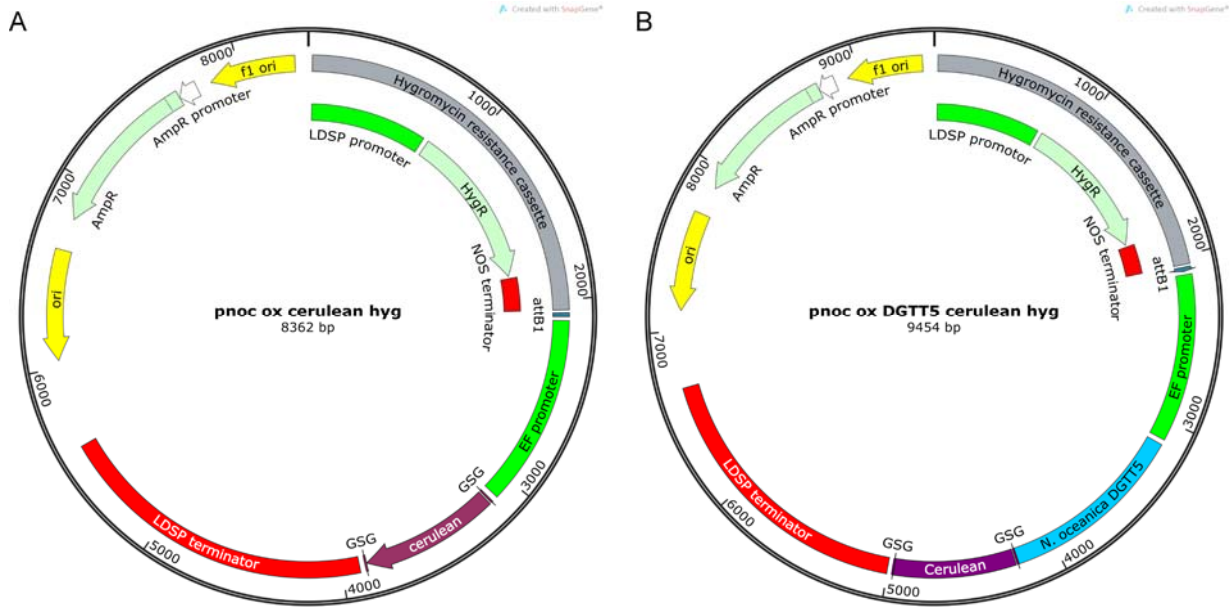

**Figure S5.** Maps of the plasmids used for the generation of *N. oceanica* *DGTT5*-overexpressing strains. A, pnoc ox cerulean hyg vector control. B, pnoc ox *DGTT5* cerulean hyg for overexpressing *DGTT5*.
