# Supplementary material for: Enhancing oil production and harvest by combining the marine alga Nannochloropsis oceanica and the oleaginous fungus Mortierella elongata
Source: PubMed Central journal article supplement (PMC6013958; doi:10.1186/s13068-018-1172-2), 2018-06-22
Supplement: 13068_2018_1172_MOESM8_ESM.pdf [file 13068_2018_1172_MOESM8_ESM.pdf]

**Table S2.** Predicted genes and proteins involved in fatty acid and glycerolipid synthesis in *M. elongata* AG77.

| <b>Fatty acid biosynthesis</b>                 |                                      |             |                      |                   |
|------------------------------------------------|--------------------------------------|-------------|----------------------|-------------------|
|                                                | <b>Description</b>                   | <b>Name</b> | <b>Transcript ID</b> | <b>Protein ID</b> |
| <b>Acetyl-CoA carboxylase components</b>       | acetyl-CoA carboxylase               | ACC         | 134167               | 133928            |
|                                                | acetyl-CoA carboxylase, subunit beta | ACC         | 67410                | 67171             |
|                                                | acetyl-CoA carboxylase, subunit beta | ACC         | 75685                | 75446             |
|                                                | acetyl-CoA carboxylase, subunit beta | ACC         | 75799                | 75560             |
|                                                | malonyl-CoA decarboxylase            | MLYCD       | 100665               | 100426            |
|                                                | malonyl-CoA decarboxylase            | MLYCD       | 81573                | 81334             |
|                                                | acyl carrier protein                 | ACP         | 128202               | 127963            |
|                                                | acyl carrier protein                 | ACP         | 139468               | 139229            |
| <b>Type I fatty acid synthase</b>              | fatty acid synthase                  | FAS         | 1805138              | 1804883           |
| <b>putative fatty acid synthase components</b> | malonyl-CoA:ACP malonyltransferase   | FabD        | 144910               | 144671            |
|                                                | malonyl-CoA:ACP malonyltransferase   | FabD        | 522882               | 522643            |
|                                                | 3-oxoacyl-ACP synthase, KASI/II      | FabB/F      | 115244               | 115005            |
|                                                | 3-oxoacyl-ACP synthase, KASI/II      | FabB/F      | 1878602              | 1878347           |
|                                                | 3-hydroxydecanoyl-ACP dehydratase    | FabA        | 131674               | 131435            |
|                                                | putative 3-Ketoacyl-ACP reductase    | FabG        | 1769266              | 1769011           |
| <b>Elongases</b>                               | acyl-CoA elongase                    | ELO         | 132697               | 132458            |
|                                                | acyl-CoA elongase                    | ELO         | 134272               | 134033            |
|                                                | acyl-CoA elongase                    | ELO         | 140756               | 140517            |
|                                                | acyl-CoA elongase                    | ELO         | 141020               | 140781            |
|                                                | acyl-CoA elongase                    | ELO         | 14820                | 14581             |
|                                                | acyl-CoA elongase                    | ELO         | 147783               | 147544            |
|                                                | acyl-CoA elongase                    | ELO         | 148635               | 148396            |
|                                                | acyl-CoA elongase                    | ELO         | 165821               | 165582            |
| acyl-CoA elongase                              | ELO                                  | 1880273     | 1880018              |                   |
| <b>Desaturases</b>                             | fatty acid $\Delta$ 9-desaturase     | FADS9       | 107360               | 107121            |
|                                                | fatty acid $\Delta$ 9-desaturase     | FADS9       | 108744               | 108505            |
|                                                | fatty acid $\Delta$ 9-desaturase     | FADS9       | 138135               | 137896            |
|                                                | fatty acid $\Delta$ 9-desaturase     | FADS9       | 1816261              | 1816006           |
|                                                | fatty acid $\Delta$ 6-desaturase     | FADS6       | 134789               | 134550            |
|                                                | fatty acid $\Delta$ 6-desaturase     | FADS6       | 158522               | 158283            |
|                                                | fatty acid desaturase                | FAD         | 140331               | 140092            |
|                                                | fatty acid desaturase                | FAD         | 1751385              | 1751130           |
|                                                | fatty acid desaturase                | FAD         | 15652                | 15413             |
|                                                | fatty acid $\Delta$ 12-desaturase    | FADS12      | 17302                | 17063             |
|                                                | fatty acid $\Delta$ 5-desaturase     | FADS5       | 87849                | 87610             |
| fatty acid $\Delta$ 15-desaturase              | FADS15                               | 152410      | 152171               |                   |
| <b>Acyl-CoA thioesterase</b>                   | acyl-CoA thioesterase                | ACOT        | 14633                | 14394             |
|                                                | acyl-CoA thioesterase                | ACOT        | 54405                | 54166             |

|                                  |                                               |             |                   |                   |
|----------------------------------|-----------------------------------------------|-------------|-------------------|-------------------|
| <b>and synthetase</b>            | acyl-CoA thioesterase                         | ACOT        | 561278            | 561039            |
|                                  | acyl-CoA thioesterase                         | ACOT        | 33252             | 33013             |
|                                  | acyl-CoA synthetase                           | ACSL        | 123145            | 122906            |
|                                  | acyl-CoA synthetase                           | ACSL        | 134960            | 134721            |
|                                  | acyl-CoA synthetase                           | ACSL        | 143367            | 143128            |
|                                  | acyl-CoA synthetase                           | ACSL        | 75546             | 75307             |
|                                  | acyl-CoA synthetase                           | ACSL        | 131674            | 131435            |
|                                  | acyl-CoA synthetase                           | ACSL        | 150818            | 150579            |
|                                  | acyl-CoA synthetase                           | ACSL        | 72538             | 72299             |
|                                  | acyl-CoA synthetase                           | ACSL        | 74248             | 74009             |
|                                  | acyl-CoA synthetase                           | ACSL        | 81012             | 80773             |
|                                  | acyl-CoA synthetase                           | ACSL        | 94221             | 93982             |
|                                  | acyl-CoA synthetase                           | ACSL        | 126107            | 125868            |
| acyl-CoA synthetase              | ACSL                                          | 73494       | 73255             |                   |
| <b>Glycerolipid biosynthesis</b> |                                               |             |                   |                   |
|                                  | <b>Description</b>                            | <b>Name</b> | <b>Transcript</b> | <b>Protein ID</b> |
|                                  | aldehyde dehydrogenase                        | ALDH        | 14282             | 14043             |
|                                  | aldehyde dehydrogenase                        | ALDH        | 138532            | 138293            |
|                                  | aldehyde dehydrogenase                        | ALDH        | 138027            | 137788            |
|                                  | aldehyde dehydrogenase                        | ALDH        | 145556            | 145317            |
|                                  | aldehyde dehydrogenase                        | ALDH        | 36004             | 35765             |
|                                  | aldehyde dehydrogenase                        | ALDH        | 34024             | 33785             |
|                                  | alcohol dehydrogenase                         | ADH         | 103662            | 103423            |
|                                  | alcohol dehydrogenase                         | ADH         | 144920            | 144681            |
|                                  | alcohol dehydrogenase                         | ADH         | 157172            | 156933            |
|                                  | alcohol dehydrogenase                         | ADH         | 80690             | 80451             |
|                                  | alcohol dehydrogenase                         | ADH         | 150046            | 149807            |
|                                  | alcohol dehydrogenase                         | ADH         | 36977             | 36738             |
|                                  | alcohol dehydrogenase                         | ADH         | 21055             | 20816             |
|                                  | alcohol dehydrogenase                         | ADH         | 84445             | 84206             |
|                                  | glycerol kinase                               | GK          | 95496             | 95257             |
|                                  | glycerol-3-phosphate dehydrogenase            | GPDH        | 141744            | 141505            |
|                                  | glycerol-3-phosphate dehydrogenase            | GPDH        | 133004            | 132765            |
|                                  | glycerol-3-phosphate dehydrogenase            | GPDH        | 143386            | 143147            |
|                                  | glycero-3-phosphate acyltransferase           | GPAT        | 132665            | 132426            |
|                                  | glycero-3-phosphate acyltransferase           | GPAT        | 71699             | 71460             |
|                                  | glycero-3-phosphate acyltransferase           | GPAT        | 136092            | 135853            |
|                                  | glycero-3-phosphate acyltransferase           | GPAT        | 426195            | 425956            |
|                                  | glycero-3-phosphate acyltransferase           | GPAT        | 114545            | 114306            |
|                                  | glycero-3-phosphate acyltransferase           | GPAT        | 156906            | 156667            |
|                                  | glycero-3-phosphate acyltransferase           | GPAT        | 142242            | 142003            |
|                                  | glycero-3-phosphate acyltransferase           | GPAT        | 138636            | 138397            |
|                                  | 1-sn-acyl-glycero-3-phosphate acyltransferase | PlsC        | 133934            | 133695            |

|               |                                               |      |        |        |
|---------------|-----------------------------------------------|------|--------|--------|
|               | 1-sn-acyl-glycero-3-phosphate acyltransferase | PlsC | 15247  | 15008  |
|               | phosphatidic acid phosphatase                 | PAP  | 72762  | 72523  |
|               | phosphatidic acid phosphatase                 | PAP  | 67757  | 67518  |
|               | phosphatidic acid phosphatase                 | PAP  | 118493 | 118254 |
|               | phosphatidic acid phosphatase                 | PAP  | 143215 | 142976 |
|               | phosphatidic acid phosphatase                 | PAP  | 141373 | 141134 |
|               | Lipin like/phosphatidate phosphatase          | LPIN | 22296  | 22057  |
|               | Lipin like/phosphatidate phosphatase          | LPIN | 33916  | 33677  |
|               | diacylglycerol kinase                         | Dgk  | 32027  | 31788  |
|               | diacylglycerol kinase                         | Dgk  | 143293 | 143054 |
|               | diacylglycerol kinase                         | Dgk  | 133967 | 133728 |
|               | diacylglycerol kinase                         | Dgk  | 111955 | 111716 |
|               | diacylglycerol kinase                         | Dgk  | 133379 | 133140 |
|               | diacylglycerol kinase                         | Dgk  | 134894 | 134655 |
| TAG synthesis | diacylglycerol acyltransferase                | DGAT | 102618 | 102379 |
|               | diacylglycerol acyltransferase                | DGAT | 14740  | 14501  |
|               | diacylglycerol acyltransferase                | DGAT | 135508 | 135269 |
|               | phospholipid diacylglycerol acyltransferase   | PDAT | 872488 | 872249 |
